# Supplementary material for: Impaired RIPK1 ubiquitination sensitizes mice to TNF toxicity and inflammatory cell death
Source: PubMed Central journal article supplement (PMC7937686; doi:10.1038/s41418-020-00629-3), 2020-09-30

# Supplementary Figure 1

**A**

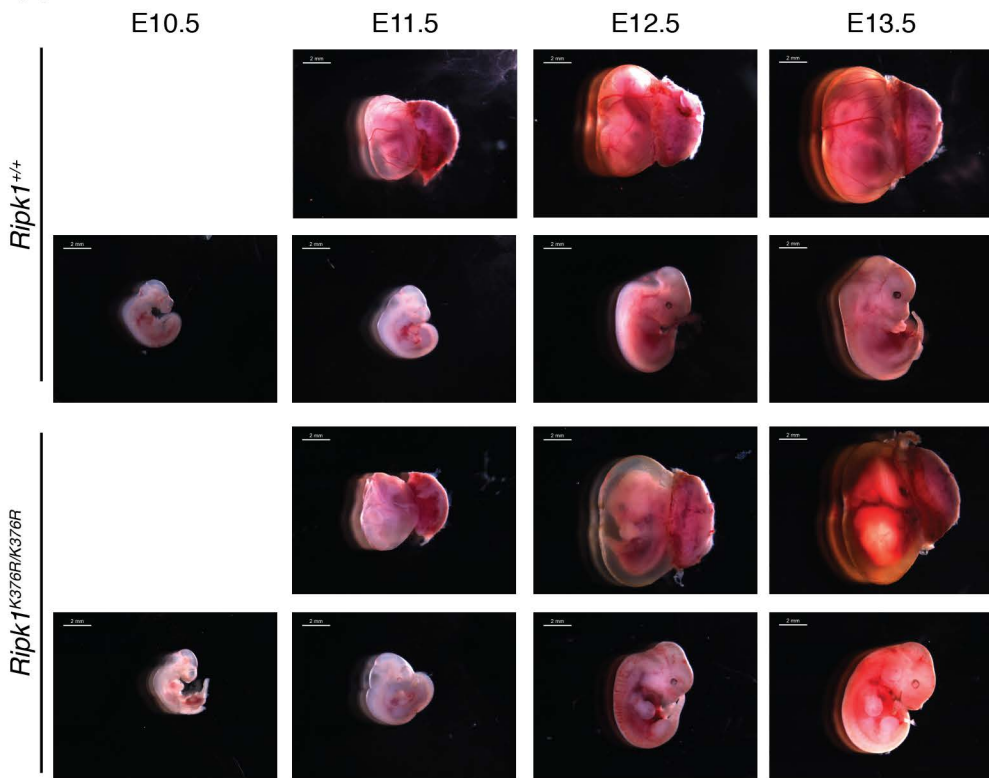

**B**

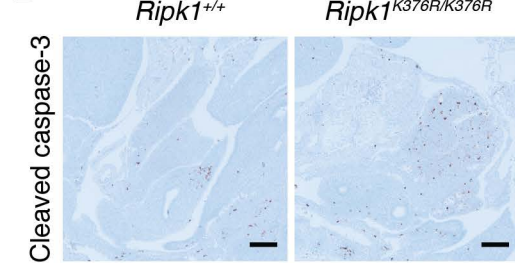

**C**

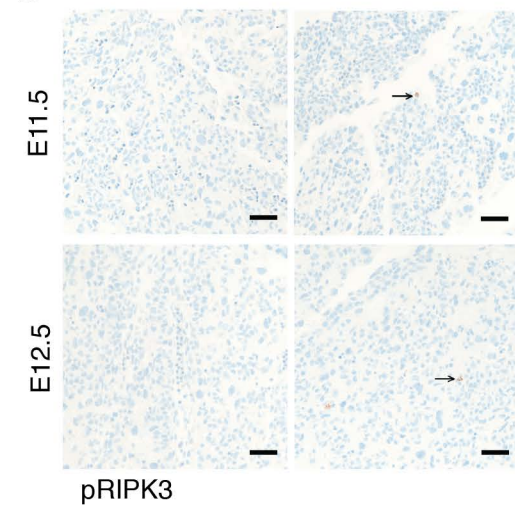

**D**

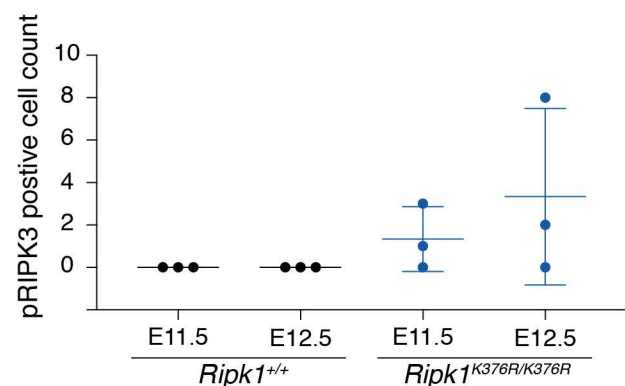

**E**

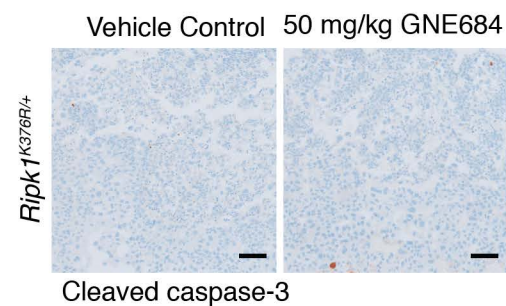

**G**

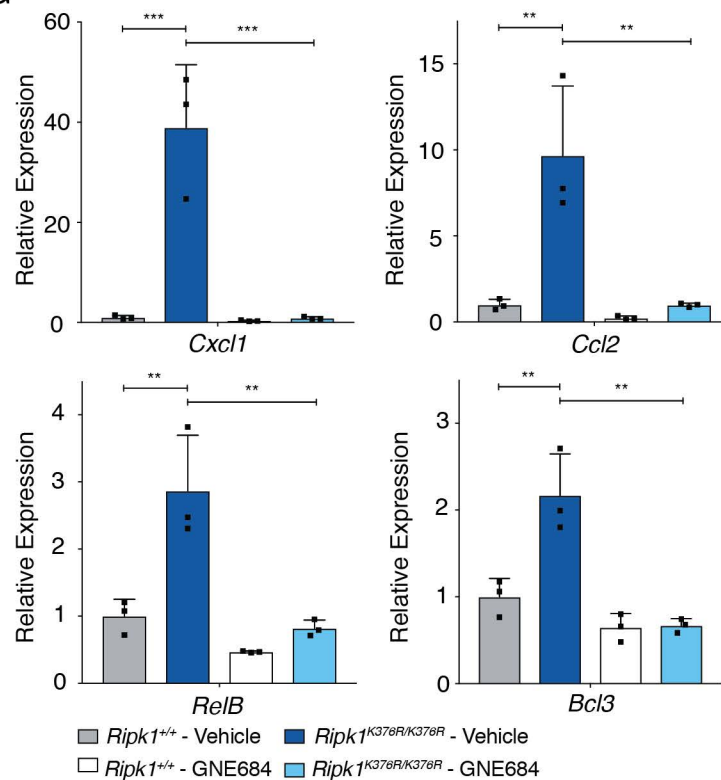

**F**

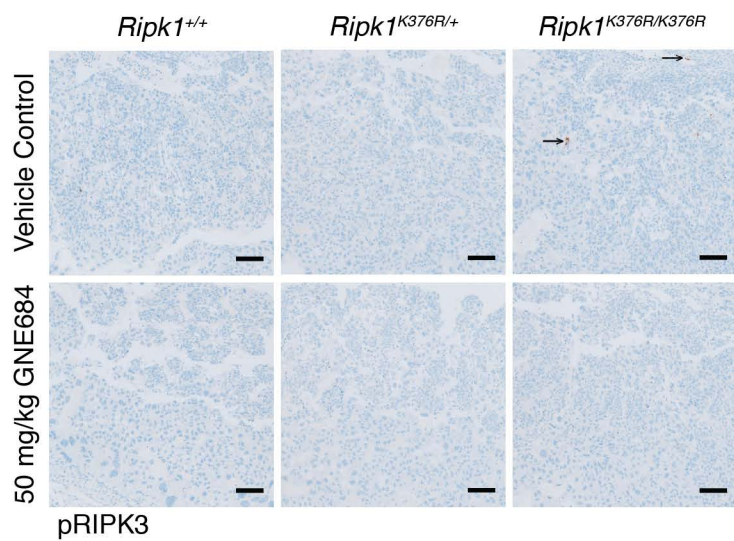

# Supplementary Figure 2

## A

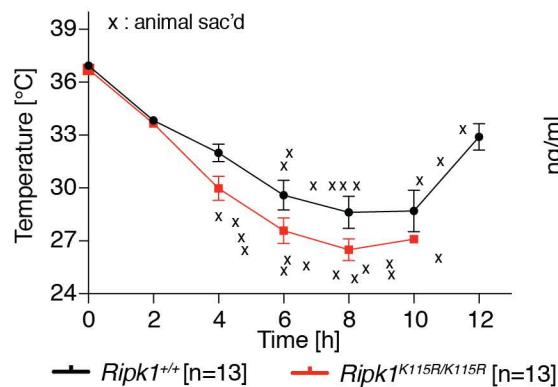

## B

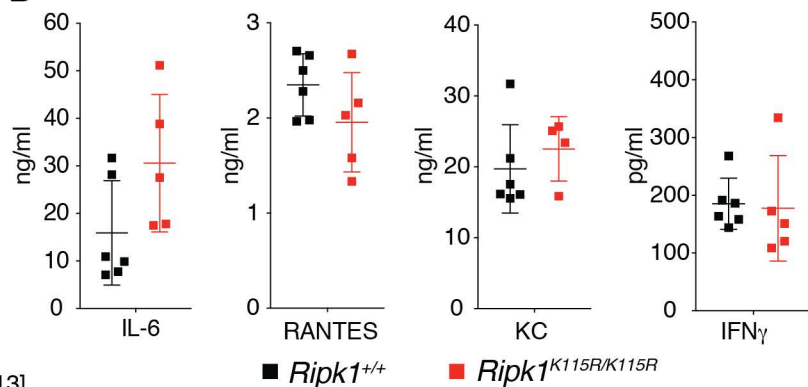

## C

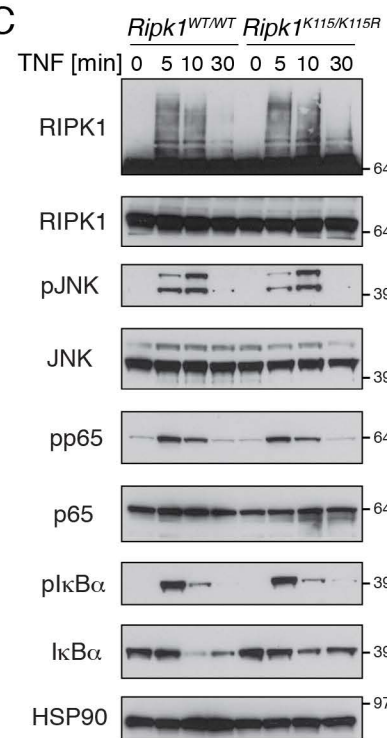

## D

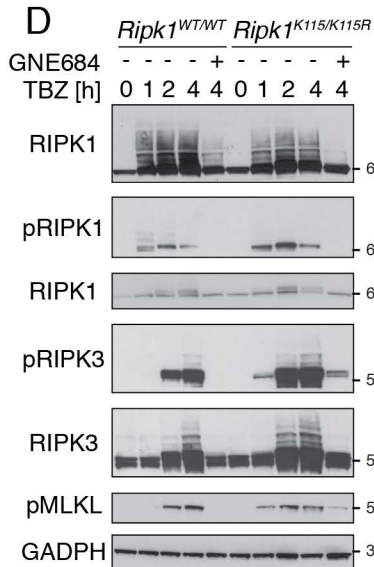

## E

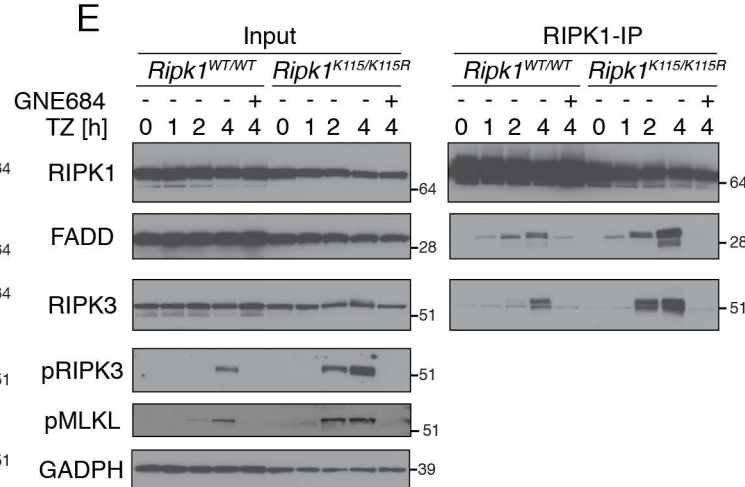

## F

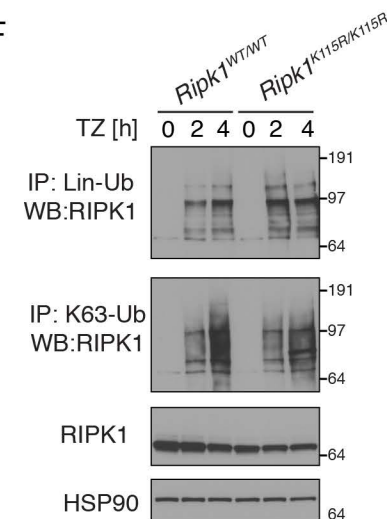

## G

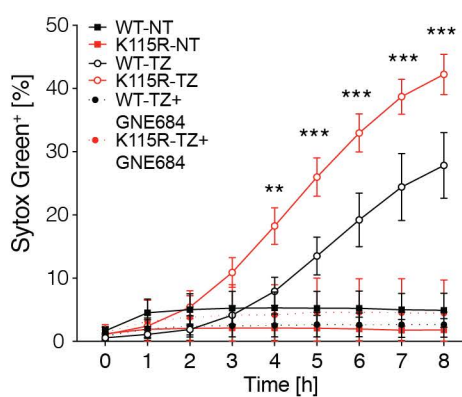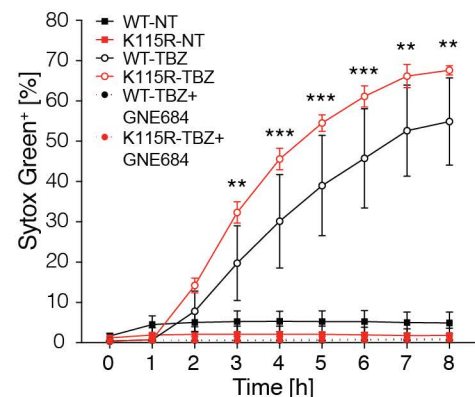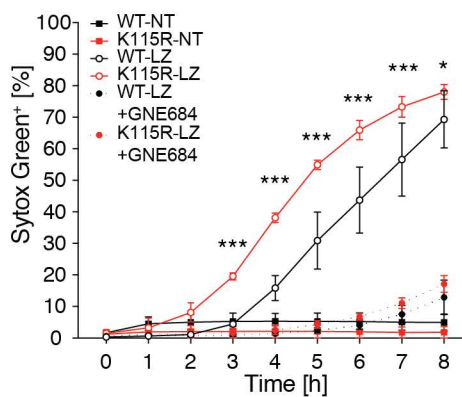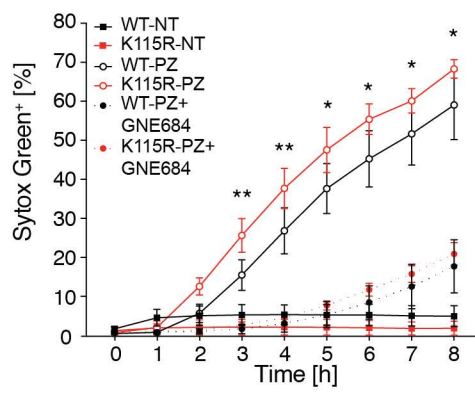

# Supplementary Figure 3

## A

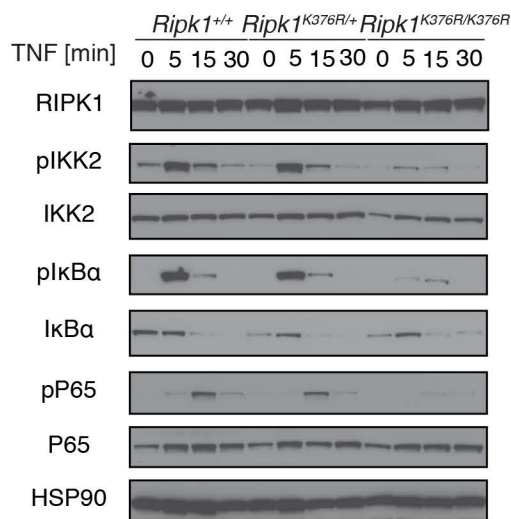

## B

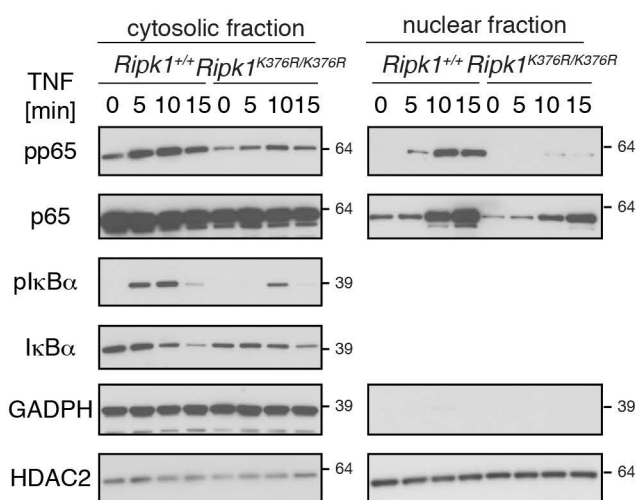

## C

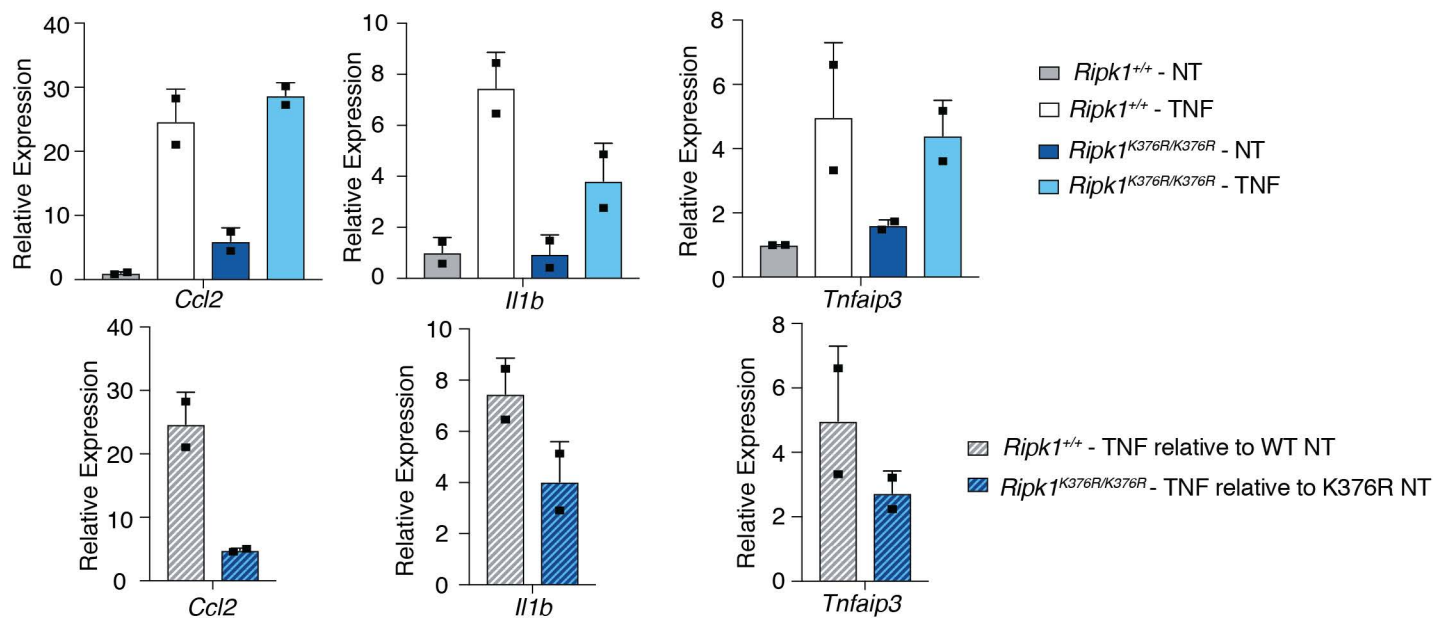

## D

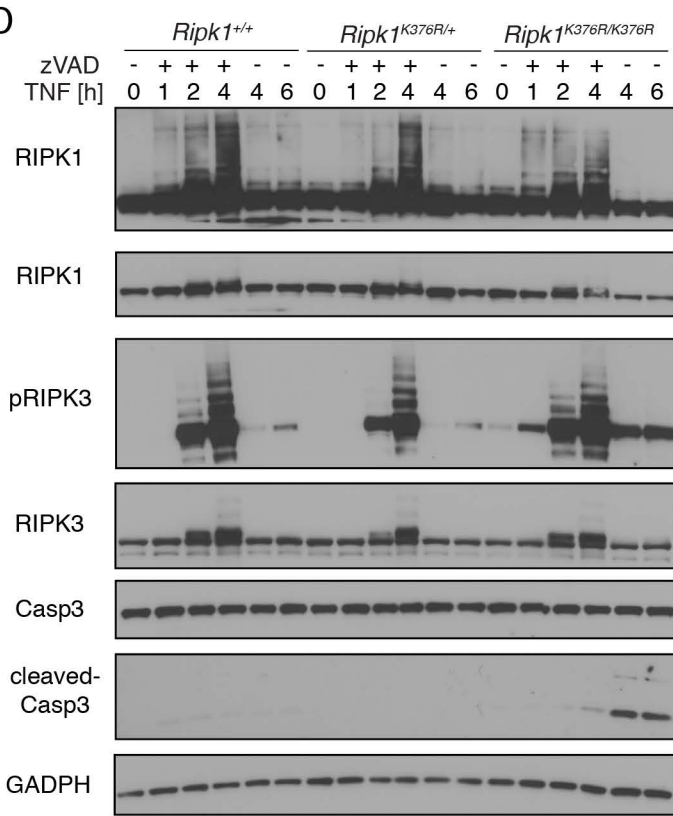

## E

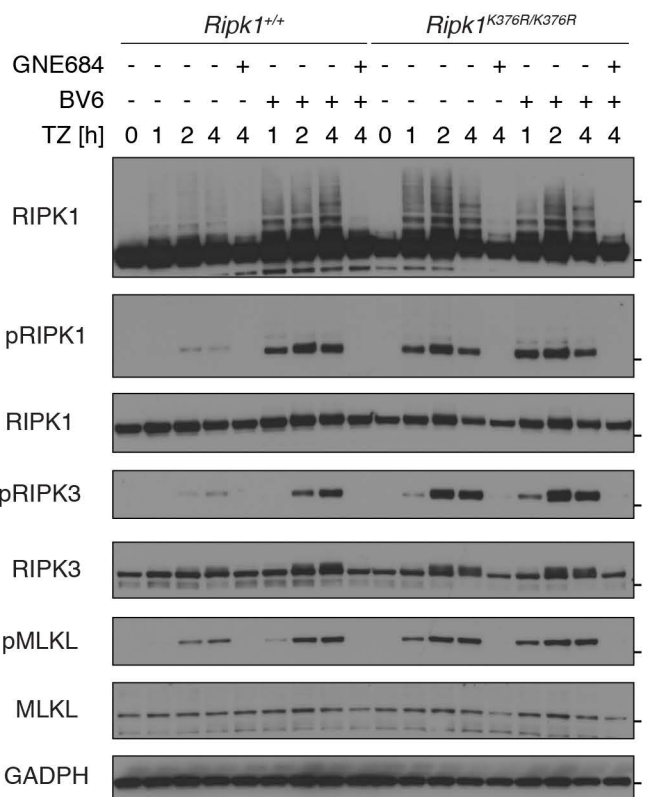



# Supplementary Figure 4

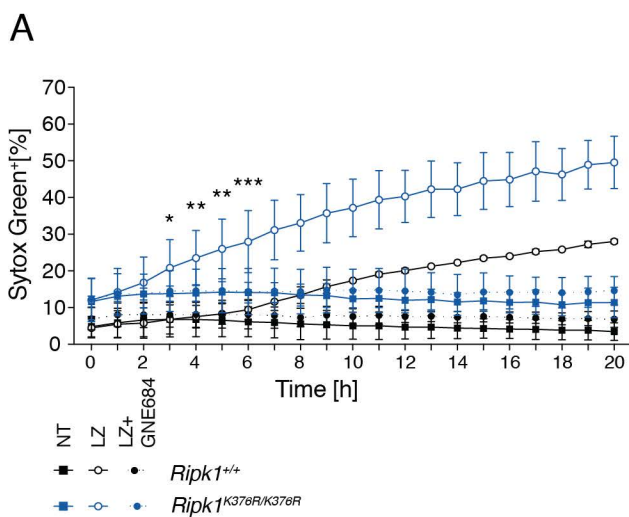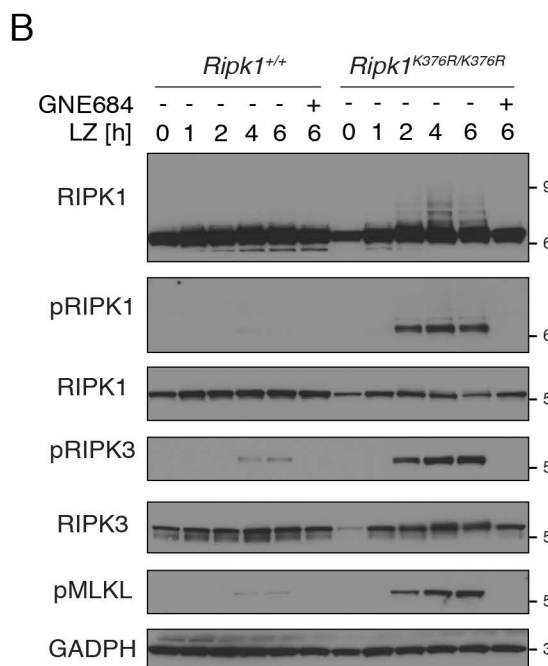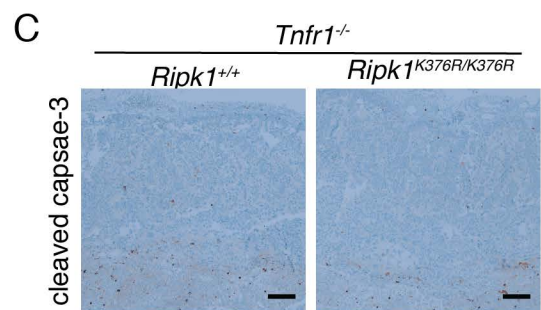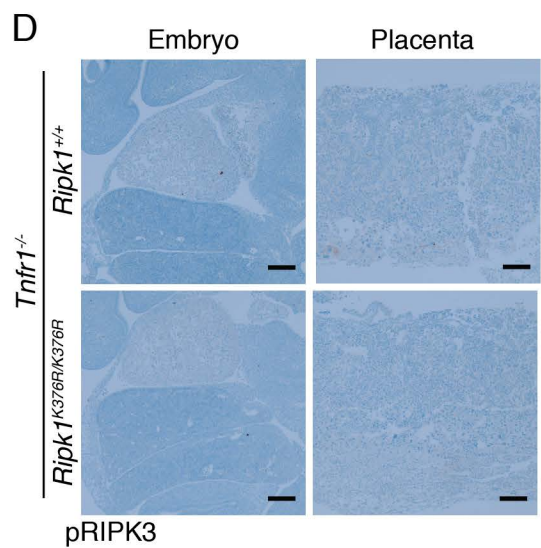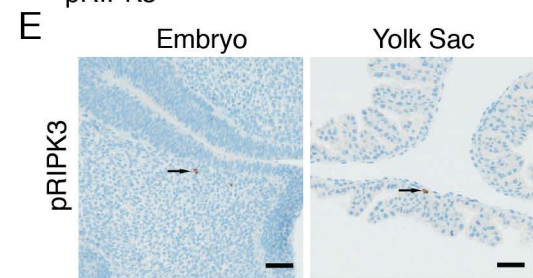

**G**

|                             | <i>Ripk1</i> <sup>+/+</sup> | various genotypes* | <i>Ripk1</i> <sup>K376R/K376R</sup> |
|-----------------------------|-----------------------------|--------------------|-------------------------------------|
| <i>Casp8</i> <sup>-/-</sup> |                             |                    |                                     |
| <i>Ripk3</i> <sup>-/-</sup> |                             |                    |                                     |
| Adult                       | 7                           | 17                 | 7                                   |

\*: 9 *Ripk1*<sup>K376R/+</sup> *Casp8*<sup>-/-</sup> *Ripk3*<sup>-/-</sup>  
 5 *Ripk1*<sup>K376R/+</sup> *Casp8*<sup>+/-</sup> *Ripk3*<sup>-/-</sup>  
 3 *Ripk1*<sup>+/+</sup> *Casp8*<sup>-/-</sup> *Ripk3*<sup>-/-</sup>

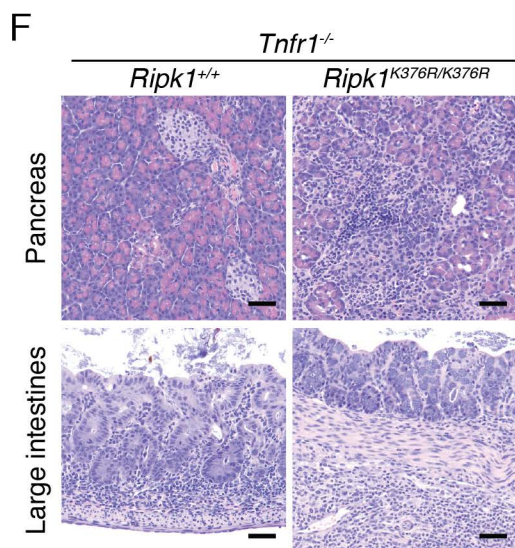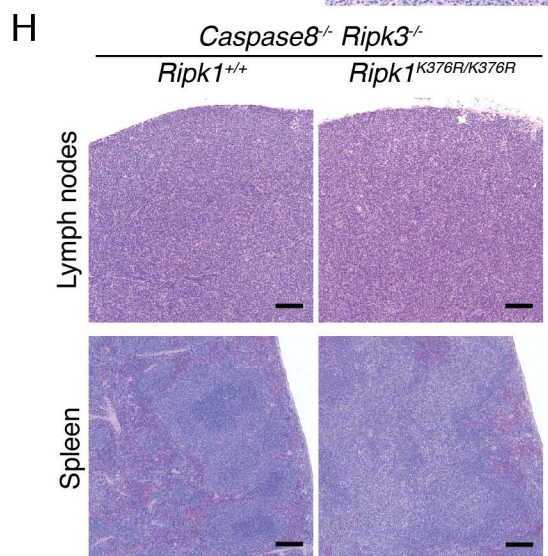

# Supplementary Figure 5

## A

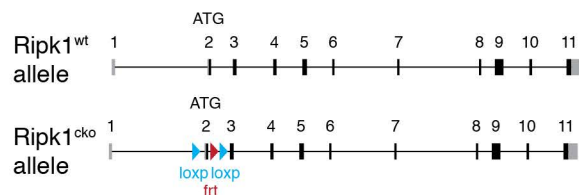

## B

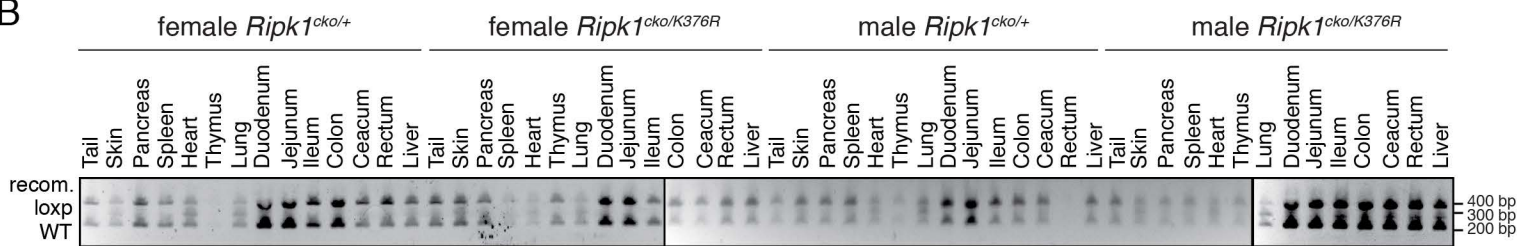

## C

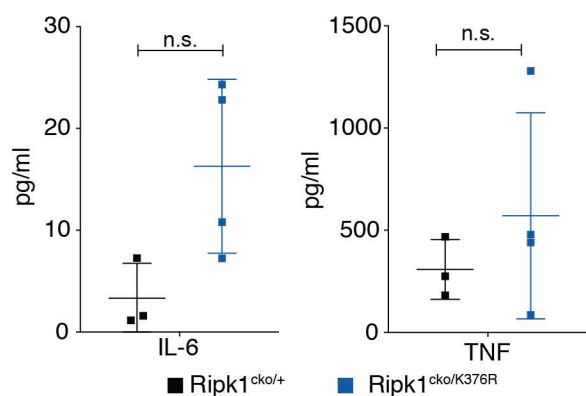

## D

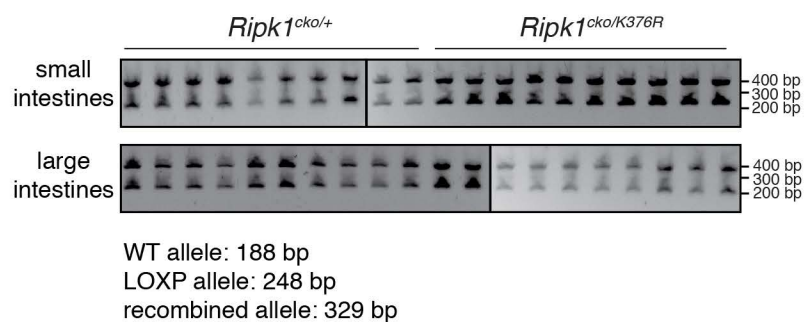

## E

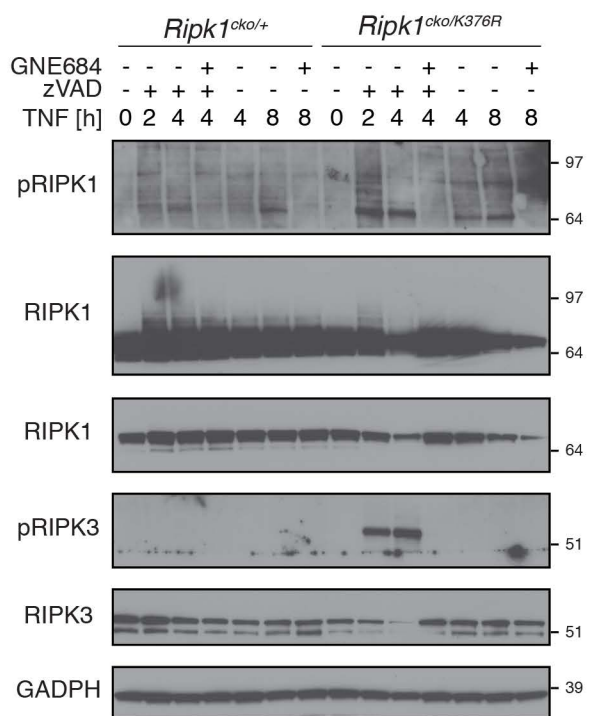

## F

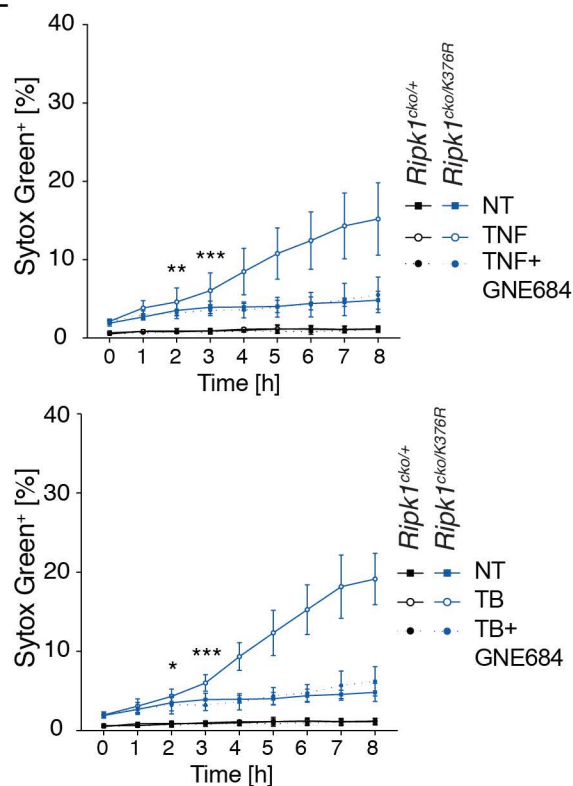

# Supplementary Figure 6

## A

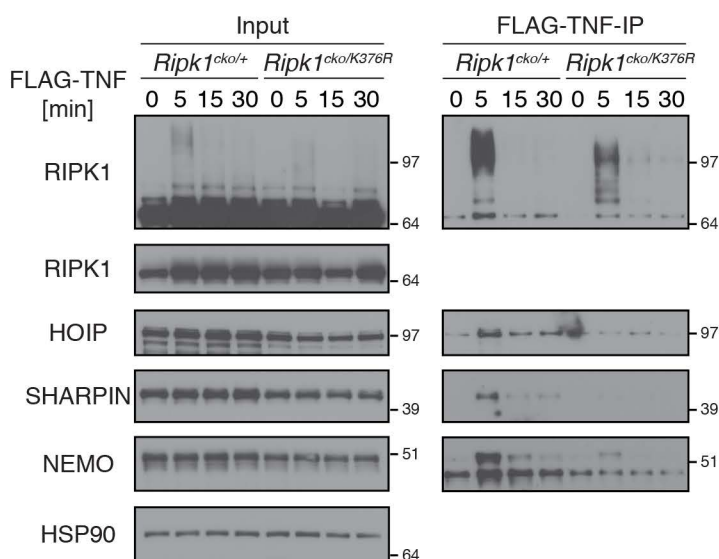

## B

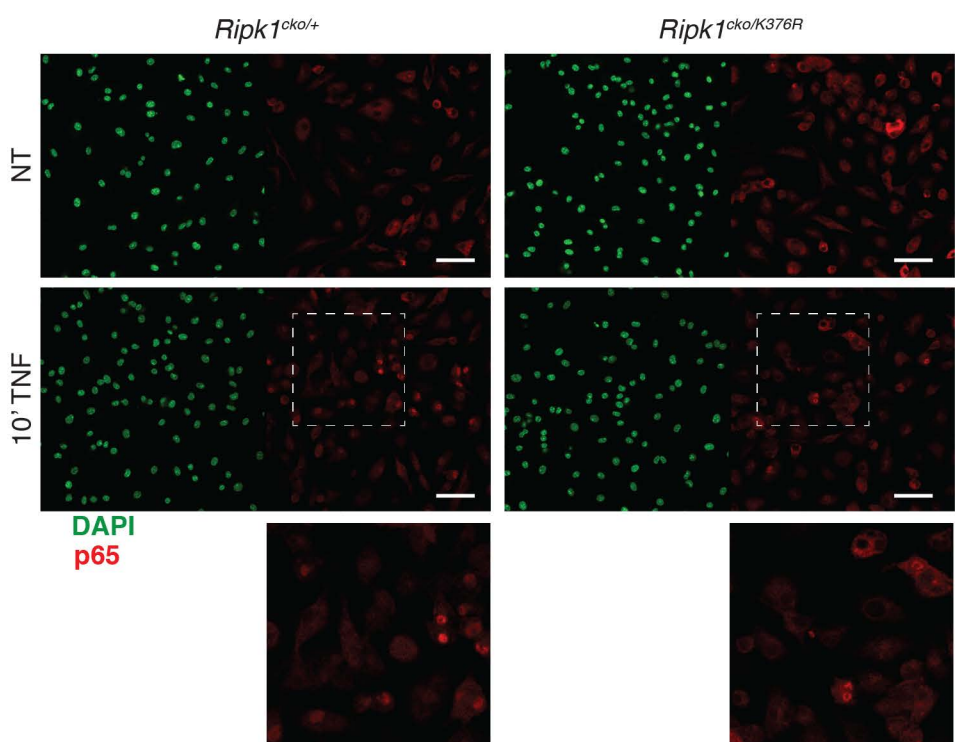

## C

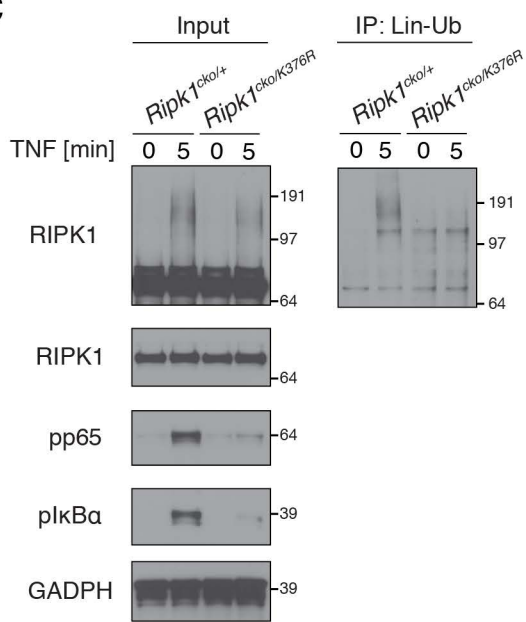

Supplement: 41418_2020_629_MOESM2_ESM.pdf [file 41418_2020_629_MOESM2_ESM.pdf]
